# Supplementary material for: Mechanisms of action of triptolide against colorectal cancer: insights from proteomic and phosphoproteomic analyses
Source: publisher site journal article supplement (doi:10.18632/aging.203992), 2022-04-02
Supplement: Supplementary file [file aging-v14i7-203992-supplementary-material-SD2.pdf]

## SUPPLEMENTARY TABLES

**Supplementary Table 1. The top ten proteins screened by four classification methods.**

| Degree    | Closeness | EPC      | MNC       |
|-----------|-----------|----------|-----------|
| IMP3      | IMP3      | IMP3     | IMP3      |
| BYSL      | PDCD11    | BYSL     | BYSL      |
| PDCD11    | BYSL      | PDCD11   | PDCD11    |
| PNO1      | PNO1      | RRS1     | PNO1      |
| NSA2      | NSA2      | RPF2     | NSA2      |
| MPHOSPH10 | MPHOSPH10 | BMS1     | MPHOSPH10 |
| RPF2      | RPF2      | NOC4L    | RPF2      |
| RSL1D1    | RRS1      | NSA2     | RSL1D1    |
| RBM28     | NOC4L     | PNO1     | RBM28     |
| RRS1      | RSL1D1    | KIAA0020 | RRS1      |

**Supplementary Table 2. The top ten phosphorylation modified proteins screened by four classification methods.**

| Degree   | Closeness | EPC     | MNC      |
|----------|-----------|---------|----------|
| SRSF1    | SRSF1     | SRSF1   | SRSF1    |
| NCBP1    | HNRNPC    | HNRNPC  | NCBP1    |
| HNRNPC   | NCBP1     | HNRNPA1 | HNRNPC   |
| HNRNPA1  | HNRNPA1   | NCBP1   | HNRNPA1  |
| DHX9     | DHX9      | DHX9    | DHX9     |
| SF3B1    | SF3B1     | SF3B1   | SF3B1    |
| DDX5     | DDX5      | RBM25   | DDX5     |
| RBM25    | HIST1H4F  | SRSF9   | RBM25    |
| SNRNP70  | RBM25     | DDX5    | SNRNP70  |
| HIST1H4F | SRSF9     | SF3B3   | HIST1H4F |

**Supplementary Table 3. Interaction of hub genes with triptolide.**

| Gene name | PDB ID | Herbs      | $\Delta G_b$    | H-Bonds              |
|-----------|--------|------------|-----------------|----------------------|
|           |        |            |                 | Type amino acid      |
| AMD1      | 3DZ7   | Triptolide | -5.2803--5.7650 | H-donor Arg A-20     |
| IMP3      | 6FQR   | Triptolide | -5.6453--6.1944 | H-donor Lys A-3      |
|           |        |            |                 | H-donor Asn B-146    |
|           |        |            |                 | H-acceptor Asn B-146 |
| HNRNPC    | 2MZ1   | Triptolide | -5.0554--5.8036 | H-donor Arg 17       |
| DHX9      | 3VYX   | Triptolide | -5.3092--5.4239 | H-donor Thr 216      |
